# Supplementary material for: Role of α7-nicotinic acetylcholine receptor in nicotine-induced invasion and epithelial-to-mesenchymal transition in human non-small cell lung cancer cells
Source: PubMed Central journal article supplement (PMC5312305; doi:10.18632/oncotarget.10498), 2016-07-08
Supplement: oncotarget-07-59199-s001.pdf [file oncotarget-07-59199-s001.pdf]

## Role of $\alpha 7$ -nicotinic acetylcholine receptor in nicotine-induced invasion and epithelial-to-mesenchymal transition in human non-small cell lung cancer cells

### SUPPLEMENTARY TABLE

Supplementary Table S1: The primer sequences used for PCR

#### A. The primer sequences used for PCR of nAChR subunits

| Gene                | Primer Sequence (5' - 3') | Fragment (bp) |
|---------------------|---------------------------|---------------|
| $\alpha 1$ NAChR_F  | gaatgagcaatgggtggattac    | 452           |
| $\alpha 1$ NAChR_R  | tgacgaagtggtaggtgatgtc    |               |
| $\alpha 2$ NAChR_F  | gtctggctaaaacaggagtggag   | 499           |
| $\alpha 2$ NAChR_R  | ggatgatgaggttgatggtgta    |               |
| $\alpha 3$ NAChR_F  | tggtgaaggtggatgaagtaa     | 490           |
| $\alpha 3$ NAChR_R  | gagtatgtgatgctgggtaga     |               |
| $\alpha 4$ NAChR_F  | ggatgagaagaaccagatgatga   | 487           |
| $\alpha 4$ NAChR_R  | gacgaaggcataggtgatgtc     |               |
| $\alpha 5$ NAChR_F  | atggagaatgggagattgtgag    | 386           |
| $\alpha 5$ NAChR_R  | tgaggaagaacgatgatgaatg    |               |
| $\alpha 6$ NAChR_F  | caagtagaaggcaaaacaaaagc   | 464           |
| $\alpha 6$ NAChR_R  | aacacagtcagagaaagcaggac   |               |
| $\alpha 7$ -nAChR_F | tgactcgaaccactcacc        | 499           |
| $\alpha 7$ -nAChR_R | gcactcatagaaccttctactcc   |               |
| $\beta 1$ NAChR_F   | cctgctgaccttactgtgttc     | 363           |
| $\beta 1$ NAChR_R   | ggtttgggaagagaaaatcac     |               |
| $\beta 2$ NAChR_F   | ctggaagcctgaagagttgac     | 452           |
| $\beta 2$ NAChR_R   | ggatgatgaggttgatggtgta    |               |
| $\beta 3$ NAChR_F   | cggagaatgggaaataactgaac   | 354           |
| $\beta 3$ NAChR_R   | aacacggtaacaatgatggaca    |               |
| $\beta 4$ NAChR_F   | aacaggaatggactgattaccg    | 480           |
| $\beta 4$ NAChR_R   | ggatgatgaggttgatggtgta    |               |
| $\beta$ -ACTIN_F    | ctgggacgacatggagaaaa      | 434           |
| $\beta$ -ACTIN_R    | aagggaaggctggaagagtgctc   |               |

**B. Primer sequences used for genes of epithelial and mesenchymal markers**

| Gene             | Primer Sequence (5' - 3') | Fragment(bp) |
|------------------|---------------------------|--------------|
| Cdh1_F1          | cttctgctgatcctgtctgatg    | 322          |
| Cdh1_R1          | agtcacacacgctgacctctaa    |              |
| VIM_F            | tacaaatccaagttgctgacct    | 500          |
| VIM_R            | tcgttgataacctgtccatctct   |              |
| SNAI2_F1         | caaaaccagagatcctcacctc    | 349          |
| SNAI2_R1         | gatttctagactgggcatcac     |              |
| SNAI1_F1         | atccagagttacctccagca      | 409          |
| SNAI1_R1         | tcctgttcagatttgcagt       |              |
| CTNNB1_F1        | tccaagtcctgtatgagtgg      | 414          |
| CTNNB1_R1        | agcagacaccatctgaggaga     |              |
| CDH2_F           | gggtaatcctccaaatcaaat     | 455          |
| CDH2_R           | taatgaagtcaccaatgtctcc    |              |
| CLDN1_F1         | agaagatgaggatggctgtca     | 249          |
| CLDN1_R1         | ttggtgtgggtaagaggttg      |              |
| TWIST1_F1        | gtccgcagctctacaggag       | 148          |
| TWIST1_R1        | gtctgaatcttctcagcttgc     |              |
| CLDN1_F1         | agaagatgaggatggctgtca     | 249          |
| CLDN1_R1         | ttggtgtgggtaagaggttg      |              |
| TWIST1_F1        | gtccgcagctctacaggag       | 148          |
| TWIST1_R1        | gtctgaatcttctcagcttgc     |              |
| $\beta$ -actin_F | ctgggacgacatggagaaaa      | 434          |
| $\beta$ -actin_R | aaggaaggctggaagagtgc      |              |
